# Supplementary material for: Observation-based estimates of volume, heat and freshwater exchanges between the subpolar North Atlantic interior, its boundary currents and the atmosphere
Source: Copernicus journal article supplement (doi:10.5194/egusphere-2022-472), 2022-06-20
Supplement: Supplementary file [file egusphere-2022-472-AC1-supplement.pdf]

## Responses to Reviewer 1

This manuscript presents an innovative analysis of recent North Atlantic hydrographic measurements along with ancillary data sets to quantify the overturning in the subpolar gyre.

I think this is a well-written and very interesting paper that significantly contributes to the understanding of water mass transformation in the subpolar North Atlantic. In my opinion, the analysis has two major weaknesses, namely (i) that the perimeter contour for large parts of the domain is oriented along the major boundary current system such that the cross-contour component of the flow is a small residual relative to the along-contour flow and (ii) that the perimeter contour has too coarse resolution to capture important components of the circulation, in particular the overflows through Denmark Strait and Faroe Bank Channel. I am not sure that these two weaknesses can be robustly addressed, but I think that at least a more extensive discussion of these two concerns is necessary. I also have a few other comments that I hope the authors will consider. Finally, I would like to emphasize that I think this manuscript ingeniously utilizes existing observations to address an important and challenging scientific question; I support the effort and encourage the authors to submit a revised version of the manuscript.

General comments:

Most of the major currents of the subpolar gyre boundary current system have substantial flow along the 1000 m isobath, such as the East Greenland (Le Bras et al., 2020) and West Greenland Currents (Pacini et al., 2020), and the dominant isopycnal slope along this depth contour is across the boundary current system. These currents are to varying extent subject to meanders and instabilities (e.g., Prater, 2002; Pacini and Pickart, 2022), which introduce substantial variability in the measurements. Quantifying the cross-slope geostrophic flow from the isopycnal slope along a depth contour that is characterized by substantial and vigorous dynamics is not optimal. Choosing a deeper isobath for the perimeter contour would likely alleviate the problem. While there are other good reasons for choosing the 1000 m depth contour, I think more robust estimates of cross-contour flow would be obtained along a deeper isobath. I will not advocate that the analysis is redone, but would like to see this issue more extensively discussed in the paper.

For the horizontal gridding along the perimeter contour, a resolution of 150 km was used. The coarse resolution may suffice for the large-scale, geostrophic interior-boundary exchange. However, very important contributions to this exchange occurs on much smaller spatial scales, in particular eddies and deep overflows from the Nordic Seas, but also currents such as the Deep Western Boundary Current are not resolved at this scale. While eddies may roughly balance in- and outward fluxes across the perimeter contour, the overflows and the water masses they entrain are crucial inflows into the subpolar gyre that will not have been properly accounted for. Downstream of Denmark Strait, the overflow plume has a spatial scale of much less than 100 km and rapidly descends beneath the 1000 m depth contour (Dickson and Brown, 1994; Girton and Sanford, 2003) – hence the Denmark Strait overflow cannot be the main source of inflow near Cape Farewell.

General response:

Thank-you for the broad and constructive review. We largely agree with the suggested changes and will implement where indicated in our responses.

Reviewer 1 highlighted two key concerns with the method. The first concern related to the choice of the 1000 m contour as the domain boundary, as in some regions the intense boundary currents

bisect this contour. As correctly highlighted, the cross-contour component of the flow used in this study is small compared to the along contour component.

The choice of the 1000 m isobath was motivated by several considerations. First, Argo profiles play a major role in the observational analysis, so if the curtain of data is to be in contact with the seabed, we are limited to isobaths shallower than 2000 m. Second, the choice of isobaths greater than ~1500 m result in Rockall Plateau being excluded from the domain. One of the main regions where the boundary currents are offshore of the 1000 m contour is off southwest Greenland (the WGC). In this region the continental slope is very steep and a choice of 2000 m or more as the reference isobath does not prevent the boundary current crossing the contour. In fact, when recreating the analysis in VIKING20X using the 2400 m isobath as the reference contour, we found the cross-boundary flows became more intense. This appears to be because the WGC crosses the 2400 m isobath more abruptly than it crosses the 1000 m isobath. The intense boundary currents also remain offshore of the 2400 m isobath along the western Labrador Sea.

To exclude all the major boundary currents from the domain, we might consider offsetting the boundary contour a set distance offshore from an isobath. However, the convenient geostrophic constraint provided by a constant-depth curtain of data is then lost, and we exacerbate the problem of undiagnosed flow under the data curtain. As suggested by Reviewer 1, we have expanded the discussion of the choice of contour to include some of the points raised here.

The second concern was with our choice of resolution for the climatology, and whether this resulted in the exclusion of small-scale but dynamically important features such as overflows. We did try different horizontal resolutions, and we thought the 150km horizontal grid size the best compromise between spatial resolution and the available profile density. In particular, we wanted a climatology which could be robustly split into 4 seasons without regions of poor coverage emerging. While the 150 km resolution was a good compromise for the boundary as a whole, Reviewer 1 highlights that some important small-scale features such as the overflows may be lost due to resolution and smooth scale.

To investigate the extent to which the resolution impacted our ability to resolve the overflows, we examined the raw Argo and CTD profiles in the dataset for evidence of the TS characteristics of overflow water at the expected locations of the Denmark Strait Overflow and Faroe Bank Channel Overflow. We found that very few (<10) profiles featured the expected TS properties. One reason for this finding appears to be the geometry of the 1000 m data cut-off relative to the seabed; the near-bed overflows only intersect with the data collection region close where it is in contact with the bed. Increasing the resolution would therefore not substantially increase the prominence of the overflows as they are not being captured in the raw profiles. See the geometry of the data collection region relative to the seabed in Fig. 12 in the manuscript. Note also that choosing a deeper reference contour would not alleviate this problem. We list several other factors which might limit our ability to properly sample the overflows using scattered CTD and Argo profiles in the manuscript.

Further, we argue that even if the overflows were perfectly resolved, a substantial portion of their flow is ageostrophic (as evidenced by the VIKING20X analysis) and so would not contribute to the volume transport estimates. We already stress that the omission of the overflows will have little impact on the overturning findings, as the overturning streamfunction is integrated from the surface downwards, and the overflows are too dense to undergo further transformation in the domain. However, we will expand the discussion of the potential impact on the heat and freshwater estimates in the revised manuscript and introduce the concept earlier in the manuscript.

**Specific comments:**

Line 25:

Is the minimum overturning in fall mainly comprised of the overflows from the Nordic Seas, which would form a steady baseline with minimal seasonal variability, while the maximum in spring also includes dense water formed within the subpolar gyre? Or is the surface Ekman component also an important source of variability? I think it would be good to specify the cause of this seasonal variability already in the abstract.

Surface Ekman appears to be the main driver of this seasonality. Added a sentence to clarify.

Line 36: Including the estimate of 30526 TW across the Greenland-Scotland Ridge by Tsubouchi et al. (2021) would be another very relevant point of comparison here.

Thank-you for the suggestion. Added to text.

Line 48: Another important component of the return flow from the Arctic Ocean and Nordic Seas is the surface outflow of Polar Water in the East Greenland Current (de Steur et al., 2017).

Good point, added to text.

Line 60: The relatively low impact of water mass transformation in the Labrador Sea on the AMOC was known also prior to OSNAP (e.g., Pickart and Spall, 2007).

Modified text to include this point.

Line 64: The importance of water mass transformation north of the Greenland-Scotland Ridge for supply of dense water to the lower limb of the AMOC should not be underestimated (e.g., Chafik and Rossby, 2019).

Added a note clarifying this point.

Line 99: Another important dynamical consideration is that, apart from the overflows, most of the sinking occurs along the boundary (Spall and Pickart, 2000; Johnson et al., 2019)

Modified text to include this point.

Line 148: If the minimal search radius is 150 km, equal to the distance between grid points, most of the profiles are probably used in more than one grid cell. Did you apply any weighting to emphasize the contributions of profiles closer to the grid point or the perimeter contour?

We did not attempt any weighting in the along-contour direction, or in the distance from the perimeter contour. Added a note in the text to clarify this point. As property gradients are high in the across-contour direction, weighting by distance from the contour may result in unpredictable responses to data scatter. As noted in the next point, we feel that the uncertainty analysis provides a robust view of the errors which might result from the existing gridding approach.

Line 199: This is a great approach to estimate the statistical uncertainty inherent in the data set. Providing the measurement errors that are also inherent in the data set, such that the magnitudes of the statistical and measurement uncertainties can directly be compared, would also be good.

We now include the measurement errors associated with CTDs, Argo and satellite ADT. We found that the scatter in results which might be expected due to measurement error was negligible when compared with the statistical uncertainty.

Line 210: Please provide some more details regarding the calculation of the surface Ekman transport. For example, what have you taken to be the depth of the Ekman layer?

For the flux and overturning calculations, the Ekman transports are added to velocities in the top 20 m cell. They therefore act on the corresponding top cells of the gridded temperature and salinity.

Line 258: Important flows on relatively small scale such as the overflows from the Nordic Seas and the East Greenland Spill Jet (Pickart et al., 2005) are not properly resolved. Perhaps EN4 at 47°N is not the sole cause of the imbalance, if these features, along with the Deep Western Boundary Current, substantially contribute to the imbalance?

As discussed later in the manuscript, we found a good qualitative agreement between the calculated geostrophic velocities and those diagnosed in VIKING20X, suggesting that the observations were capturing the important flows across the boundary above 1000 m. The 'remainder' term in the model (including most of the overflow transports) is flow that we would not be able to include using the geostrophic approach, even with perfect sampling.

Line 283: What are the length scales over which the satellite absolute dynamic topography product was smoothed? On line 183 it is stated that smoothing was applied to mimic the smoothing inherent in the hydrographic gridding process. Is the resulting length scale of the eddy kinetic energy consistent with eddies scaled by the Rossby radius, or were all eddies, to the extent that they were represented in the raw satellite record, removed by the smoothing procedure?

These instances reflect different treatments of the satellite ADT product for different purposes. There is no smoothing applied to the ADT prior to computing the eddy kinetic energy or diffusive fluxes. Added text to clarify this point.

Line 308: Offshore fluxes of freshwater from the Greenland shelf into the interior Labrador Sea near Cape Farewell (Lin et al., 2018) and farther north where the West Greenland Current encounters steep topography and becomes unstable (e.g., Fratantoni, 2001; Prater, 2002) are likely major contributors to the cold, fresh low-density layer. Both of these processes are primarily eddy-driven, hence postulating that a portion of the West Greenland Current crosses into the interior subpolar gyre may not be necessary. These processes will not be resolved at 150 km horizontal resolution. Given the turbulent nature of these fluxes, it is also not obvious that there will be a consistent geostrophic flux across the perimeter contour.

This is a good point, added text to clarify the probable cause of the cold, fresh intrusion. As you say, these fluxes are primarily turbulent and may not be associated with a positive geostrophic flow so we still state that this may be due to the WGC moving into deeper water in this region.

Lines 349 and 491: Most of the Atlantic Water inflow from the subpolar gyre to the Nordic Seas takes place east of Iceland, roughly evenly split on either side of the Faroe Islands (Østerhus et al., 2019). Given the course resolution of the perimeter contour, I think it is more appropriate to ascribe this flow to the Iceland-Scotland Ridge rather than the Wyville Thomson Ridge (note that Thomson is spelled without a p).

Agreed; updated text.

Line 351: Note that there is also some flow of Atlantic Water northward through Denmark Strait (Jonsson and Valdimarsson, 2012; Semper et al., 2022).

Thank-you; added to text.

Line 352: What is the magnitude of the retroflexion of the East Greenland Current near Cape Farewell?

5.1 Sv flow from the EGC into the central Irminger basin (Holliday et al., 2007); added to text.

Line 357: An export of 12 Sv from the subpolar gyre to the Labrador shelf is immense. Is this a realistic number? Could this be related to water sinking along the boundary (e.g., Johnson et al., 2019) or merge with the boundary current system (a substantial portion of which appears to be inshore of the 1000 m isobath, Zantopp et al., 2017)?

The description stating that  $\sim 12$  Sv flowed onto the shelf was misleading. Inference of on-shelf flow in fact stops at  $\sim 9200$  km, at which point the flow is not onto the shelf but through and over the Flemish Cap. Whilst the core of the boundary current is inshore of the 1000 m isobath, at 53 N it extends 75-100 km offshore of the 1000 m isobath (e.g. Fig. 8 in Zantopp et al., 2017). If we assume this region averages  $10 \text{ cm s}^{-1}$  (referring again to Zantopp et al., 2017) this suggests several Sv of the boundary current could be within the boundary contour (and above 1000 m) at this latitude. The remainder is gained just south of the OSNAP crossing. The volume flowing south through the Flemish Pass could account for 6-10 Sv (Petrie and Buckley 1996). Added the above transport estimates to the manuscript.

Line 450: Good discussion of missing contributions. While the model has a much higher resolution, how confident can you be that it is able to realistically capture these features?

These small-scale baroclinic features are always going to be challenging for a basin-scale model to accurately represent, but their contributions to the volume budget of the SPG do appear to be reasonably consistent with observation campaigns (e.g. Biastoch et al., 2021, Harden et al., 2016; Jochumsen et al., 2017).

Lines 493, 631, and 696: It is not obvious why there should be a lower layer inflow in the vicinity of Cape Farewell. This is too far south of Denmark Strait to be ascribed to the overflow (Dickson and Brown, 1994; Girton and Sanford, 2003), but perhaps the East Greenland Spill Jet (Pickart et al., 2005) contributes? Please elaborate.

We should probably reiterate that in the context of the Irminger and Labrador Basins, our definition of the lower layer ( $> 27.54 \text{ kg/m}^3$ ) is still quite light. Examining Figs. 3c and d, it's clear that this density class accounts for all transport below  $\sim 150$  dbar. Given the water properties in this region are those of the EGC (Holliday et al., 2007), it seems likely that this inflow is at least in part due to the  $\sim 5.1$  Sv retroflexion of the EGC into the Irminger Sea observed by Holiday et al. (2007). As we note in the manuscript, another factor could be the tendency of the EGC to track deeper isobaths west of Cape Farewell as the shelf edge steepens. Added notes to this effect at the suggested locations in the manuscript.

Line 525: This estimate of advective flux across the Iceland-Scotland Ridge appears to be in reasonably good agreement with the estimate of Tsubouchi et al. (2021).

Thank-you for pointing this out, noted in text.

Lines 572 and 726: There is substantial discussion of the high EKE west of Greenland in the literature (e.g., Fratantoni, 2001; Prater, 2002).

Thank-you; added to text.

Line 599: The overturning across the Greenland-Scotland Ridge would be another vital point of comparison (e.g., Østerhus et al., 2019; Tsubouchi et al., 2021).

Added to text.

Line 618: How does the density surface of  $27.30 \text{ kg/m}^3$  for maximum overturning compare to similar results from Lozier et al. (2019) and Petit et al. (2020)?

$27.30 \text{ kg/m}^3$  is substantially lighter than the density of maximum overturning found by Lozier et al. (2019) ( $27.66 \text{ kg/m}^3$ ) and Petit et al. (2020) ( $27.55 \text{ kg/m}^3$ ). These comparisons added to the text.

Line 623: This is an important result, which substantially modifies the conclusions of Petit et al. (2020). Without velocity measurements, they considered this water mass transformation part of the overturning in the subpolar gyre, and concluded that more deep-water formation occurs in the subpolar gyre than in the Nordic Seas. You have demonstrated that a substantial portion of this

intermediate-density water continues to the north, into the Nordic Seas, where it is further transformed. As such, densification in the subpolar gyre preconditions further water mass transformation in the Nordic Seas and is thereby important for the North Atlantic overturning, but it is not appropriate to ascribe that part of the water mass transformation to overturning in the subpolar gyre, since the water proceeds into the Nordic Seas in the upper layer rather than returning to the south at depth.

Thank-you for highlighting this point. We have modified the text to clarify the role of pre-conditioning based on our findings, and how this differs from the findings of Petit et al. (2020).

Line 639: Overflow waters from the Nordic Seas become lighter as they mix with and entrain ambient water masses while descending to the abyss of the subpolar North Atlantic. I do not think there are other processes that can make the overflow waters significantly lighter. In general, the overflow waters are located too deep in the Labrador Sea, where the deepest convection occurs, to be accessed during convection in winter (Yashayaev, 2007). More importantly, for the overflow waters to be modified by convective mixing, the mixed layer would have to be sufficiently deep that it extends into the overflow layer. Since the ocean is stably stratified, the density of the mixed layer would then have to be at least the same as the density of the overflow layer. For this reason, deep convection would not make the overflow water lighter.

Thank-you for pointing this out. Modified text to state that this is most likely due to mixing and entrainment.

Line 642: The deepest overflows are generally considered denser than  $\sigma_t = 27.8 \text{ kg/m}^3$  (Dickson and Brown, 1994).

Modified threshold and added reference to text.

Line 649: This is a remarkably swift export of newly formed dense water, in particular considering that most of the transformation takes place within cyclonic gyres (e.g. Lavender et al., 2000; Straneo et al., 2003).

Yes, it seems a more likely cause of the springtime overturning maximum is that winter surface Ekman forcing acts to suppress overturning, shifting the peak to the spring, in a similar manner to that seen in OSNAP (Li et al., 2021a; Petit et al., 2020; Petit et al., 2021). If we remove surface Ekman forcing from the volume budget, the overturning peak occurs in winter instead. Changed text to reflect this.

Line 656: It is unclear to me how virtually all of the subpolar mode water is exported before undergoing further transformation to dense water, in particular considering that the residence time within the cyclonic gyres where most of the water mass transformation takes place may be on the order of years (Straneo et al., 2003). Please elaborate.

Only half the SPMW is exported. This sentence was confusing and has been rephrased.

Line 664: Dense-water formation is not considered a “driver” of the AMOC (Kuhlbrodt et al., 2007).

Changed to “important source of dense water masses for the lower limb of the AMOC”.

Lines 673, 681, and elsewhere: Adding uncertainties to these estimates would be good.

Added error estimates where suggested, and at other appropriate locations.

Line 714: Most high-latitude currents with substantial barotropic components closely follow density contours (e.g., Nøst and Isachsen, 2003). Instabilities in the West Greenland Current and formation of Irminger Rings may be a more likely source of this signal (Fratantoni, 2001; Prater, 2002).

Agreed, changed text and added references to reflect this.



Line 727: While deep convection at the boundary of the Labrador Sea may not have taken place in the 2000s, the boundary current system was ventilated during the more severe winters of the early- and mid-1990s (Pickart et al., 1997).

Thank-you for highlighting this. Added to text.

Line 758: I think it would be great to relate the overturning in depth space to the corresponding results obtained for the density space calculations. That would also integrate this section better within the rest of the manuscript.

The depth of density contours varies widely around the SPG so it is hard to generalise the overturning in depth space for the entire SPG boundary. We have enhanced the visibility of key overturning isopycnals in Fig. 3d (geostrophic velocity) and added them to Fig. 3c (density). We have also added a label to the overturning stream function for the 47N transect (Fig. 9c) to indicate that the 27.7 contour is at approximately 1000 m.

Line 774: This is the first proper discussion of the unresolved overflows. This is a major drawback of the coarse perimeter contour and likely has a substantial impact on the results. I think this discussion needs to be introduced much earlier in the manuscript.

As previously discussed, the inability to resolve the overflows is primarily a sampling problem and not a resolution problem. We have increased signposting to this section throughout the manuscript and have also noted the absence of the expected overflows in the Hydrography section of the results (Section 3.1). There is also an introduction to the missing overflows and other ageostrophic processes in the VIKING20XS analysis (Section 3.3).

Line 782: More recent estimates of the Denmark Strait Overflow Water transport converge at values around 3.2- 3.5 Sv (Harden et al., 2016; Jochumsen et al., 2017). This transport across the sill may then approximately double by entrainment as the dense water descends toward the abyss (Dickson and Brown, 1994). As such, VIKING20X may not be overestimating the overflow, although even in a relatively high-resolution model the overflows are probably not simulated very realistically.

Good point; added to text.

Line 788: More recent papers have made significant progress improving our understanding of the variability in Denmark Strait (Spall et al., 2019; Lin et al., 2020).

Thank-you; added references.

Line 792: All of the reasons discussed in this paragraph may contribute, but the main cause of the poorly represented overflow water must be the low horizontal resolution along the perimeter contour.

Whilst we partially agree, even in the raw CTD data, relatively few profiles capture true DSO water. Presumably unless the profile is very close to the boundary contour the overflow passes below the 1000 m curtain in our analysis. We could increase the proportion of 'overflow' profiles by reducing the offshore search area, but this would have a detrimental effect on the data density. But we have added a note in the text to acknowledge this point.

Line 802: Perhaps specify here that the dense water exiting the subpolar gyre in the North Atlantic Current continues to the north, into the Nordic Seas. As previously stated, this is an important result that demonstrates the importance of the subpolar gyre in preconditioning overturning in the Nordic Seas and thus modifies the conclusions of Petit et al. (2020).

Thank-you, modified text to clarify.

Line 812: The net sinking that occurs along the boundary (Spall and Pickart, 2000; Johnson et al., 2019) may be another such process that is important to better understand, but difficult to address using this approach.

Good point; added to text.

**Detailed comments:**

Lines 9, 105, 659, and elsewhere: Oceans and Basins should be capitalized, also in plural.

Comment addressed.

Lines 16, 299, and 485: Biscay is a province of Spain, I think Bay of Biscay would be more appropriate.

Comment addressed.

Line 28: The acronym NAC should be defined at first usage.

Comment addressed.

Line 48: "Arctic" by itself is an ill-defined term. Arctic Ocean would be better.

Comment addressed.

Lines 66, 134, 135, 138, 423, 460, 489, 492, and elsewhere: I would have added at least one "the" to these lines.

Thank-you for highlighting these omissions.

Line 93: "Deep mixing" is ambiguous. Do you mean convection=deep vertical mixing?

Yes, the intended meaning was convection. Text amended.

Line 149: A search radius cannot be negative.

Agreed. Text amended.

Line 198: Is not an integral by definition cumulative?

Agreed. Text amended.

Line 210: Data are typically considered plural.

Text amended.

Line 223: It should be: "...for an improved representation..."

Comment addressed.

Line 225: It should be: "...show that it realistically..."

Text amended.

Line 253: It should be: "...surface Ekman transports capture..."

Text amended.

Line 257: The Deep Western Boundary Current should be capitalized.

Text amended.

Line 275: It should be: "...Using ERA5 monthly means..."



Text amended.

Line 290 and elsewhere Scale-dependent is a compound modifier that should be hyphenated.

Text amended.

Line 316: The comma should be removed.

Text amended.

Line 319: The Labrador Current should be capitalized.

Text amended.

Lines 366 and 393: Transport should not be capitalized.

Text amended.

Line 382: The unit Sv is missing.

Text amended.

Line 463: A comma is missing.

Text amended.

Line 592: It should be: "...water mass transformation..."

Text amended.

S4: Gulf Stream should be capitalized.

Text amended.

## References

Chafik L, Rossby T. 2019. Volume, heat, and freshwater divergences in the Subpolar North Atlantic suggest the

Nordic Seas as key to the state of the Meridional Overturning Circulation. *Geophysical Research Letters* 46:

doi:10.1029/2019GL082110.

de Steur L, Pickart RS, Macrander A, Vage K, Harden B, Jónsson S, Østerhus S, Valdimarsson H. 2017. Liquid

freshwater transport estimates from the East Greenland Current based on continuous measurements north of

Denmark Strait. *Journal of Geophysical Research: Oceans* 122: 93–109, doi:10.1002/2016JC012106.

Dickson RR, Brown J. 1994. The production of North Atlantic Deep Water: Sources, rates and pathways.

*Journal of Geophysical Research* 99: 12 319–12 341, doi:10.1029/94JC00530.

Fratantoni DM. 2001. North Atlantic surface circulation during the 1990's observed with satellite-tracked

drifters. *Journal of Geophysical Research* 106: 22 067–22 093.

Girton JB, Sanford TB. 2003. Descent and modification of the overflow plume in the Denmark Strait. *Journal*

of *Physical Oceanography* 33: 1351–1364.

Harden BE, Pickart RS, Valdimarsson H, Richards C, V<sup>o</sup>age K, de Steur L, Bahr F, Torres DJ, Børve E, J<sup>o</sup>onsson S, Macrander A, Østerhus S, H<sup>o</sup>avik L, Hattermann T. 2016. Upstream sources of the Denmark

Strait Overflow: Observations from a high-resolution mooring array. *Deep Sea Research I* 112: 94–112,

doi:10.1016/j.dsr.2016.02.007.

Jochumsen K, Moritz M, Nunes N, Quadfasel D, Larsen KMH, Hansen B, Valdimarsson H, J<sup>o</sup>onsson S. 2017.

Revised transport estimates of the Denmark Strait overflow. *Journal of Geophysical Research: Oceans* 122:

3434–3450, doi:10.1002/2017JC012 803.

Johnson HL, Cessi P, Marshall DP, Schloesser F, Spall MA. 2019. Recent contributions of theory to our understanding of the Atlantic Meridional Overturning Circulation. *Journal of Geophysical Research: Oceans*

124: doi:10.1029/2019JC015 330.

J<sup>o</sup>onsson S, Valdimarsson H. 2012. Water mass transport variability to the north Icelandic shelf, 1994–2010.

*ICES Journal of Marine Science* : doi:10.1093/icesjms/fss024.

Kuhlbrodt T, Griesel A, Montoya M, Levermann A, Hofmann M, Rahmstorf S. 2007. On the driving processes of the Atlantic Meridional Overturning Circulation. *Reviews of Geophysics* 45: RG2001, doi:10.1029/2004RG000 166.

Lavender KL, Davis RE, Owens WB. 2000. Mid-depth recirculation observed in the interior Labrador and

Irminger Seas by direct velocity measurements. *Nature* 407: 66–69.

Le Bras IAA, Straneo F, Holte J, de Jong MF, Holliday NP. 2020. Rapid export of waters formed by convection

near the Irminger sea's western boundary. *Geophysical Research Letters* 47: doi:10.1029/2019GL085 989.

Lin P, Pickart RS, Jochumsen K, Moore GWK, Valdimarsson H, Fristedt T, Pratt LJ. 2020. "kinematic structure and dynamics of the Denmark Strait overflow from ship-based observations". *Journal of Physical*

*Oceanography* 50: 3235–3251, doi:10.1175/JPO–D–20–0095.1.

Lin P, Pickart RS, Torres DJ, Pacini A. 2018. "evolution of the freshwater coastal current at the southern tip of greenland". *Journal of Physical Oceanography* 48: 2127–2140, doi:10.1175/JPO–D–18–0035.1.

Lozier MS, Li F, Bacon S, Bahr F, Bower AS, Cunningham SA, de Jong MF, de Steur L, de Young B, Fischer J, Gary SF, Greenan BJW, Holliday NP, Houk A, Houpert L, Inall ME, Johns WE, Johnson HL, Johnson C, Karstensen J, Koman G, Le Bras IA, Lin X, Mackay N, Marshall DP, Mercier H, Oltmanns M, Pickart RS, Ramsey AL, Rayner D, Straneo F, Thierry V, Torres DJ, Williams RG, Wilson C, Yang J, Yashayaev I, Zhao J. 2019. A sea change in our view of overturning in the subpolar North Atlantic. *Science* 363: 516–521, doi:10.1126/science.aau6592.

Nøst OA, Isachsen PE. 2003. The large-scale time-mean ocean circulation in the Nordic Seas and Arctic Ocean estimated from simplified dynamics. *Journal of Marine Research* 61: 175–210, doi:10.1357/002224003322005 069.

Østerhus S, Woodgate R, Valdimarsson H, Turrell WR, de Steur L, Quadfasel D, Olsen SM, Moritz M, Lee CM, Larsen KMH, Jónsson S, Johnson C, Jochumsen K, Hansen B, Curry B, Cunningham S, Berx B. 2019. Arctic Mediterranean exchanges: A consistent volume budget and trends in transports from two decades of observations. *Ocean Science* 15: 379–399, doi:10.5194/os–15–379–2019.

Pacini A, Pickart RS. 2022. Meanders of the West Greenland Current near Cape Farewell. *Deep Sea Research* 179: doi:10.1016/j.dsr.2021.103 664.

Pacini A, Pickart RS, Bahr F, Torres DJ, Ramsey AL, Holte J, Karstensen J, Oltmanns M, Straneo F, Bras IAL, Moore GWK, de Jong MF. 2020. Mean conditions and seasonality of the West Greenland Boundary Current System near Cape Farewell. *Journal of Physical Oceanography* 50: doi:10.1175/JPO–D–20–0086.1.

Petit T, Lozier MS, Josey SA, Cunningham SA. 2020. Atlantic deep water formation occurs primarily in the Iceland Basin and Irminger Sea by local buoyancy forcing. *Geophysical Research Letters* 47: doi:10.1029/2020GL091 028.

Pickart RS, Spall MA. 2007. Impact of Labrador Sea convection on the North Atlantic Meridional Overturning Circulation. *Journal of Physical Oceanography* 37: 2207–2227, doi:10.1175/JPO3178.1.

Pickart RS, Spall MA, Lazier JRN. 1997. Mid-depth ventilation in the western boundary current system of the

sub-polar gyre. *Deep Sea Research I* 44: 1025–1054.

Pickart RS, Torres DJ, Fratantoni PS. 2005. The East Greenland Spill Jet. *Journal of Physical Oceanography*

35: 1037–1053.

Prater MD. 2002. Eddies in the Labrador sea as observed by profiling rafofs floats and remote sensing. *Journal*

of *Physical Oceanography* 32: 411–427, doi:10.1175/1520-0485(2002)032<0411:EITLSA>2.0.CO;2.

Semper S, V<sup>o</sup>age K, Pickart RS, J<sup>o</sup>onsson S, Valdimarsson H. 2022. Evolution and transformation of the North

Icelandic Irminger Current along the north Iceland shelf. *Journal of Geophysical Research: Oceans* 127:

10.1029/2021JC017700.

Spall MA, Pickart RS. 2000. Where does dense water sink? A subpolar gyre example. *Journal of Physical*

*Oceanography* 31: 810–826.

Spall MA, Pickart RS, Lin P, von Appen W, Mastropole D, Valdimarsson H, Haine TWN, Almansi M. 2019.

Frontogenesis and variability in Denmark Strait and its influence on overflow water. *Journal of Physical*

*Oceanography* 49: doi:10.1175/JPO-D-19-0053.1.

Straneo F, Pickart RS, Lavender KL. 2003. Spreading of Labrador Sea Water: An advective-diffusive study

based on Lagrangian data. *Deep Sea Research I* 50: 701–719.

Tsubouchi T, V<sup>o</sup>age K, Hansen B, Larsen KMH, Østerhus S, Johnson C, J<sup>o</sup>onsson S, Valdimarsson H. 2021.

Increased ocean heat transport into the Nordic Seas and Arctic Ocean over the period 1993-2016. *Nature*

*Climate Change* 11: doi:10.1038/s41558-020-00941-3.

Yashayaev I. 2007. Hydrographic changes in the Labrador Sea, 1960-2005. *Progress in Oceanography* 73:

242–276, doi:10.1016/j.pocean.2007.04.015.

Zantopp R, Fischer J, Visbeck M, Karstensen J. 2017. From interannual to decadal: 17 years of boundary

current measurements at the exit of Labrador Sea. *Journal of Geophysical Research: Oceans* 122:

doi:10.1002/2016JC012771.

## References

Biastoch, A., Schwarzkopf, F.U., Getzlaff, K., Ruhs, S., Martin, T., Scheinert, M., Schulzki, T., Handmann, P.,

Hummels, R. and Böning, C.W.: Regional imprints of changes in the Atlantic meridional overturning circulation in the eddy-rich ocean model VIKING20X, *Ocean Sci. Discuss.*, 1-52, 2021.

Harden, B.E., Pickart, R.S., Valdimarsson, H., Våge, K., de Steur, L., Richards, C., Bahr, F., Torres, D., Børve, E., Jónsson, S. and Macrander, A.: Upstream sources of the Denmark Strait Overflow: Observations from a high-resolution mooring array, *Deep-Sea Res. Pt. I*, 112, 94-112, doi:10.1016/j.dsr.2016.02.007, 2016.

Holliday, N. P., Meyer, A., Bacon, S., Alderson, S. G. and de Cuevas, B.: Retroflexion of part of the east Greenland current at Cape Farewell, *Geophys. Res. Lett.*, 34(7), 7609, doi:10.1029/2006GL029085, 2007

Jochumsen, K., Moritz, M., Nunes, N., Quadfasel, D., Larsen, K.M., Hansen, B., Valdimarsson, H. and Jonsson, S.: Revised transport estimates of the Denmark S trait overflow, *J. Geophys. Res. Ocean.*, 122(4), 3434-3450, doi:10.1002/2017JC012803, 2017.

Petrie, B. and Buckley, J.: Volume and freshwater transport of the Labrador Current in Flemish Pass. *J. Geophys. Res. Ocean.*, 101(C12), 28335-28342, doi:10.1029/96JC02779, 1996.

Zantopp, R., Fischer, J., Visbeck, M. and Karstensen, J.: From interannual to decadal: 17 years of boundary current transports at the exit of the Labrador Sea, *J. Geophys. Res. Ocean.*, 122(3), 1724-1748, doi:10.1002/2016JC012271, 2017.
